# Supplementary material for: Infectious tenosynovitis with bloodstream infection caused by Erysipelothrix rhusiopathiae, a case report on an occupational pathogen
Source: Springer Nature journal article supplement (doi:10.1186/s12879-016-2102-1), 2017-01-05

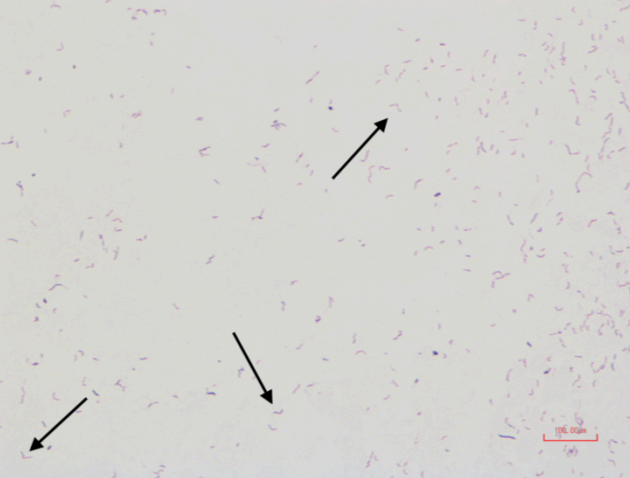

Supplement: MOESM1 [file 11981392]
